# Supplementary material for: Genetic mapping of the Andean anthracnose resistance gene present in the common bean cultivar BRSMG Realce
Source: Front Plant Sci. 2022 Nov 14;13:1033687. doi: 10.3389/fpls.2022.1033687 (PMC9728541; doi:10.3389/fpls.2022.1033687)
Supplement: Supplementary file 8 [file Table_6.xlsx]

## Sheet: Supplementary_Table_5
Supplementary Table 6. Genetic map of 161 F2 plants derived from the cross between BRSMG Realce and BRS FC104 with 1,315 SNP markers obtained after linkage analysis using 4,074 SNP markers. Accessory marks are underlined and in italics.
Pv01		Pv02		Pv03		Pv04		Pv05		Pv06		Pv07		Pv08		Pv09		Pv10		Pv11
Marker	Position, cM	Marker	Position, cM	Marker	Position, cM	Marker	Position, cM	Marker	Position, cM	Marker	Position, cM	Marker	Position, cM	Marker	Position, cM	Marker	Position, cM	Marker	Position, cM	Marker	Position, cM
Chr01_51319646_snp7653	0	Chr02_9710_snp8762	0	Chr03_53265486_snp1215	0	Chr04_45082434_snp5292	0	Chr05_40482868_snp9248	0	Chr06_31196836_snp5025	0	Chr07_39742952_snp3706	0	Chr08_866998_snp3830	0	Chr09_984100_snp6056	0	Chr10_44261780_snp3651	0	Chr11_39817_snp4207	0
Chr01_51335493_snp2599	3.47	Chr02_327825_snp6564	9.18	Chr03_53221007_snp11611	6.83	Chr04_43887952_snp9908	7.14	Chr05_40551999_snp1012	5.79	Chr06_31133671_snp6875	1.88	Chr_0_contigsnp6587	3.47	Chr08_810665_snp3664	12.59	Chr09_1129105_snp10126	2.83	Chr10_43969198_snp2514	7.86	Chr11_27513_snp8931	5.46
Chr01_51155567_snp1571	6.62	Chr02_196816_snp86	13.96	Chr_0_contigsnp5379	11.96	Chr04_43597198_snp11931	11.26	Chr_0_contigsnp10980	10.24	Chr06_30877454_snp4454	4.07	Chr07_39422123_snp11571	7.91	Chr08_630313_snp5300	21.05	Chr09_3189265_snp2443	6.62	Chr10_43919780_snp401	10.7	Chr11_220190_snp4311	10.27
Chr01_51072534_snp5442	8.81	Chr02_520142_snp6074	16.8	Chr_0_contigsnp9146	14.16	Chr04_43521680_snp6050	12.19	Chr05_40722165_snp8389	12.12	Chr06_30759777_snp10022	6.26	Chr07_39256792_snp1097	12.03	Chr_0_contigsnp5465	24.03	Chr09_7344029_snp1864	10.41	Chr10_43628214_snp1397	17.81	Chr11_384121_snp3696	19.95
Chr01_50969279_snp10845	11.33	Chr02_564543_snp2954	18.36	Chr03_53146273_snp1353	17	Chr_0_contigsnp6079	14.07	Chr05_40060828_snp1812	16.58	Chr_0_contigsnp5736	8.45	Chr07_38989781_snp943	16.16	Chr08_750860_snp3721	24.65	Chr09_7892079_snp4173	12.91	Chr10_43614406_snp12	22.59	Chr11_468428_snp8428	25.42
Chr01_50943621_snp3834	12.89	Chr02_659621_snp4914	19.29	Chr03_53067056_snp7776	18.57	Chr04_42229881_snp6436	16.89	Chr05_39934393_snp11333	19.09	Chr06_30473371_snp2951	11.29	Chr07_38817136_snp6009	17.09	Chr08_873557_snp6426	25.9	Chr09_8651006_snp8146	16.69	Chr10_43496361_snp6253	24.79	Chr11_567013_snp6420	29.55
Chr01_50768327_snp4175	17.21	Chr02_675420_snp9533	20.85	Chr03_52984501_snp4388	20.77	Chr04_42159718_snp11301	18.45	Chr05_39721415_snp7547	24.2	Chr06_30267048_snp2379	14.12	Chr07_38839354_snp1225	18.01	Chr08_980582_snp12231	30.2	Chr09_8756781_snp7716	18.89	Chr10_43434436_snp3863	26.98	Chr11_625424_snp8955	31.43
Chr01_50754297_snp11345	19.84	Chr02_701428_snp2922	22.72	Chr03_52961178_snp9256	23.29	Chr04_41878249_snp8700	20.96	Chr05_39720871_snp8759	27.35	Chr06_30237792_snp8226	17.74	Chr07_38658803_snp1286	19.26	Chr_0_contigsnp5370	34.16	Chr_0_contigsnp5375	21.08	Chr10_43399319_snp2417	30.46	Chr11_821665_snp5161	33.95
Chr01_50674178_snp6132	23.64	Chr02_778487_snp11215	25.24	Chr_0_contigsnp9337	27.38	Chr04_41857223_snp5563	24.75	Chr05_39672766_snp8015	29.23	Chr_0_contigsnp6029	22.05	Chr07_38560307_snp2528	22.09	Chr08_1080429_snp6946	35.72	Chr09_10495915_snp11657	23.59	Chr10_43281515_snp1237	37.04	Chr11_821611_snp9538	35.19
Chr_0_contigsnp6156	29.4	Chr02_819644_snp1360	27.75	Chr03_52702729_snp2343	34.83	Chr04_41573180_snp3736	28.54	Chr05_39566784_snp4356	31.12	Chr06_29931154_snp4277	26.31	Chr07_38393886_snp8487	24.93	Chr08_1097956_snp1995	36.65	Chr09_10807775_snp12824	25.78	Chr10_43204137_snp3778	44.99	Chr_0_contigsnp1103	36.76
Chr01_50548065_snp4204	36.5	Chr02_993411_snp3098	30.26	Chr03_52495203_snp195	42.27	Chr04_41631087_snp4347	33.3	Chr05_39441198_snp7250	33.77	Chr06_29827467_snp7182	32.28	Chr07_38274020_snp2741	28.72	Chr08_1207785_snp10405	39.48	Chr09_11251634_snp2878	29.89	Chr10_43162582_snp133	51.07	Chr11_1015713_snp7825	38.64
Chr01_50533630_snp294	40.62	Chr_0_contigsnp6647	33.73	Chr03_52472749_snp634	47.39	Chr04_18562099_snp1725	40.54	Chr05_39555089_snp7675	41.29	Chr06_29790718_snp6797	36.41	Chr07_38194178_snp8201	32.19	Chr_0_contigsnp10909	41.68	Chr09_11635580_snp3328	34	Chr10_43118827_snp7737	54.54	Chr11_1049064_snp839	41.81
Chr01_50357244_snp4374	44.1	Chr02_1293620_snp1902	37.21	Chr03_52145937_snp384	55.55	Chr04_39975280_snp4258	50.31	Chr05_39330832_snp7624	51.62	Chr06_29678522_snp6487	45.11	Chr07_38016538_snp255	37.95	Chr08_1424362_snp4943	42.93	Chr09_12278887_snp5138	37.15	Chr10_43129878_snp7439	55.17	Chr11_1159754_snp3107	52.17
Chr01_50111678_snp2597	49.55	Chr02_1335823_snp1738	40.36	Chr03_52030188_snp7383	59.04	Chr04_40380695_snp1473	58.46	Chr05_39259263_snp63	58.56	Chr06_29648280_snp11186	52.41	Chr07_38016472_snp4441	44.12	Chr08_1630077_snp11233	44.17	Chr09_12264810_snp362	39.02	Chr_0_contigsnp5014	55.78	Chr11_1256874_snp2556	65.61
Chr01_49980955_snp7738	54.68	Chr02_1567497_snp4221	45.14	Chr03_51877763_snp1480	60.6	Chr_0_contigsnp10772	60.97	Chr05_38996140_snp2357	62.36	Chr06_29630662_snp10596	55.25	Chr07_37799025_snp7465	47.69	Chr08_1630546_snp3597	47.33	Chr09_12762477_snp9123	40.27	Chr10_42963394_snp6305	57.66	Chr11_1375571_snp8153	75.23
Chr01_50017716_snp2814	59.8	Chr02_1585045_snp11834	46.39	Chr03_51811604_snp5320	62.48	Chr04_39379369_snp3990	62.22	Chr05_38884894_snp3404	66.82	Chr06_29434349_snp8233	59.71	Chr07_37832729_snp1189	49.25	Chr08_1680365_snp546	51.78	Chr09_13002923_snp1913	44.39	Chr10_42835291_snp5347	61.45	Chr11_1379116_snp5403	79.05
Chr01_49834315_snp1816	67.95	Chr02_1819842_snp1294	48.9	Chr03_51719901_snp2231	65.31	Chr04_39377577_snp5662	63.15	Chr05_38730524_snp3730	69.33	Chr06_29382365_snp10540	65.48	Chr07_37736852_snp4411	51.44	Chr08_2013167_snp4034	58.24	Chr09_12916976_snp3907	48.51	Chr10_42767915_snp2749	64.93	Chr11_1495197_snp1851	86.56
Chr01_49809393_snp2876	71.76	Chr_0_contigsnp6264	52.06	Chr03_51823471_snp512	70.73	Chr04_39384063_snp2818	65.02	Chr05_38649942_snp8973	70.89	Chr06_29340538_snp7258	70.29	Chr07_37521342_snp6432	53.95	Chr08_2001133_snp1243	63.19	Chr09_12908447_snp7231	50.38	Chr10_42666902_snp10937	66.49	Chr11_1593671_snp9325	92.37
Chr01_49613751_snp2970	80.34	Chr02_1895441_snp9845	55.86	Chr03_51620208_snp4665	82.73	Chr04_37552665_snp1405	66.57	Chr05_38627819_snp2391	73.4	Chr06_29335780_snp3532	74.39	Chr07_37513015_snp7939	55.51	Chr08_2015509_snp1233	69.44	Chr09_13311983_snp1429	51.63	Chr10_42531291_snp5553	68.36	Chr11_1644776_snp10837	93.93
Chr01_49544474_snp7543	91.05	Chr02_1896774_snp9634	58.69	Chr03_51348127_snp1513	94.02	Chr04_35472743_snp3250	68.45	Chr05_38611717_snp929	80.87	Chr06_29294273_snp3901	76.59	Chr07_37347565_snp5466	57.39	Chr08_2113831_snp374	77.23	Chr09_13332465_snp10035	52.87	Chr10_42410969_snp8154	71.51	Chr11_1706124_snp10841	98.86
Chr01_49468979_snp366	95.45	Chr02_2238165_snp473	69.12	Chr_0_contigsnp6319	97.83	Chr04_20589888_snp2471	71.28	Chr_0_contigsnp438	90.68	Chr06_29224698_snp1505	78.78	Chr_0_contigsnp5833	63.82	Chr08_2152565_snp99	83.33	Chr09_13611037_snp8606	56.67	Chr10_42475017_snp1590	75.3	Chr11_1637078_snp2302	109.18
Chr01_49263580_snp4498	98.29	Chr02_2326582_snp3471	78.13	Chr_0_contigsnp8933	101.97	Chr04_32571940_snp158	73.46	Chr05_38418717_snp2779	93.69	Chr06_29153612_snp8109	82.26	Chr_0_contigsnp5386	68.29	Chr08_2366604_snp1832	88.44	Chr09_13924701_snp7245	62.43	Chr10_42429530_snp932	78.45	Chr11_2120622_snp7876	123.16
Chr01_48986494_snp3774	101.46	Chr02_2444255_snp10776	81.61	Chr03_51062254_snp1249	106.42	Chr04_12046097_snp45	75.98	Chr_627467_scaffold15snp1811	97.4	Chr06_28833478_snp7076	86.07	Chr07_37056602_snp8426	69.54	Chr08_2309321_snp12023	91.27	Chr09_13715939_snp3420	70.2	Chr10_42275553_snp11023	84.19	Chr11_2098248_snp3673	136.75
Chr01_48986219_snp783	106.7	Chr02_2524596_snp176	84.76	Chr_0_contigsnp2227	107.99	Chr04_11692988_snp4154	78.25	Chr_496001_scaffold15snp3827	100.56	Chr06_28759194_snp8178	93.2	Chr07_36905563_snp7663	74.01	Chr08_2680813_snp602	92.83	Chr09_13941357_snp4118	76.95	Chr10_42191723_snp11003	86.7	Chr11_2080693_snp533	143.37
Chr01_49171149_snp9907	115.77	Chr02_2684216_snp7526	88.89	Chr03_51044306_snp6950	109.55	Chr04_9336619_snp11473	84.91	Chr_358373_scaffold15snp3302	105.99	Chr06_28495708_snp3983	103.12	Chr07_36800044_snp3654	80.79	Chr08_2679083_snp8323	96.31	Chr09_13716769_snp1829	84.7	Chr10_42138725_snp1229	89.34	Chr_0_contigsnp6684	144.61
Chr01_48533615_snp6543	130.45	Chr02_2639311_snp1087	92.68	Chr03_50879132_snp7903	112.78	Chr04_9010476_snp5284	91.99	Chr_277619_scaffold15snp9390	110.43	Chr_0_contigsnp11710	107.58	Chr07_36713155_snp1337	84.27	Chr08_2843805_snp8614	101.42	Chr09_14084765_snp6495	89.8	Chr10_41922479_snp7211	95.07	Chr11_2320217_snp11409	145.55
Chr01_48536080_snp8461	142.48	Chr02_2926069_snp3627	96.16	Chr03_50769029_snp639	114.74	Chr04_9032609_snp9134	95.14	Chr_198596_scaffold15snp3576	113.58	Chr06_28705124_snp31	110.1	Chr_0_contigsnp11095	85.83	Chr08_2999290_snp9154	104.9	Chr09_13975984_snp2522	93.59	Chr10_41681015_snp772	98.01	Chr11_2412256_snp10860	148.06
Chr01_48662190_snp10333	148.08	Chr_0_contigsnp4942	98.04	Chr03_50660548_snp6550	119.53	Chr04_8785208_snp8342	97.34	Chr_204500_scaffold15snp609	118.02	Chr06_28430436_snp1210	113.91	Chr_0_contigsnp9516	87.39	Chr08_2978296_snp11777	105.52	Chr09_13922957_snp7355	100	Chr10_41643072_snp5558	99.57	Chr11_2470275_snp10092	152.52
Chr_0_contigsnp9042	149.64	Chr02_2968517_snp9080	103.8	Chr03_50707315_snp9774	128.67	Chr04_8655981_snp4961	99.53	Chr_67098_scaffold30snp1459	122.79	Chr06_28305172_snp1151	116.43	Chr_0_contigsnp5490	90.54	Chr08_3053293_snp173	106.77	Chr09_14009375_snp6731	104.44	Chr10_41686622_snp921	100.5	Chr11_2470275_snp10091	155.36
Chr01_48273485_snp1573	152.8	Chr02_3205689_snp3559	110.89	Chr03_50352208_snp12145	135.94	Chr04_8471848_snp1858	101.4	Chr_137592_scaffold30snp4990	124.35	Chr06_28200623_snp12153	117.68	Chr07_36222942_snp10587	92.42	Chr08_3711888_snp8888	109.29	Chr09_14298154_snp11944	107.91	Chr10_41476438_snp6216	103.33	Chr11_2715078_snp5920	157.56
Chr_0_contigsnp5675	155	Chr02_3408014_snp3349	115.02	Chr03_50345414_snp2483	137.5	Chr04_8250605_snp6634	104.87	Chr05_37885286_snp7987	126.54	Chr06_28374114_snp1306	123.03	Chr07_36256663_snp8872	93.35	Chr08_3692265_snp9740	109.92	Chr09_14538821_snp3742	112.03	Chr10_41185849_snp9886	106.16	Chr11_2776179_snp5628	160.19
Chr01_48442697_snp8390	156.56	Chr02_3468437_snp956	117.21	Chr03_50174945_snp9712	139.07	Chr04_7069188_snp11912	109.63	Chr05_37844659_snp4394	128.1	Chr06_28099739_snp6538	134	Chr07_36141160_snp6486	94.28	Chr08_3763716_snp610	112.43	Chr09_14719948_snp2830	114.86	Chr10_41067189_snp1003	109.95	Chr11_2737484_snp7661	164.53
Chr01_48184176_snp57	159.72	Chr02_3518768_snp4424	119.4	Chr03_50262586_snp6101	142.22	Chr04_5988895_snp316	113.1	Chr05_37885220_snp851	129.98	Chr06_28085201_snp6709	145.1	Chr_0_contigsnp9515	96.8	Chr08_4031469_snp7365	117.21	Chr09_14909561_snp1283	118.97	Chr10_40972087_snp3036	114.07	Chr11_2901988_snp820	168.66
Chr01_47956315_snp1013	161.91	Chr02_3791263_snp390	123.85	Chr03_49799440_snp3794	147.99	Chr04_5362219_snp8266	115.61	Chr_0_contigsnp9074	133.13	Chr06_27850346_snp7657	149.66	Chr07_36039673_snp510	99.96	Chr08_4015122_snp9849	118.77	Chr09_15382452_snp7487	123.09	Chr_0_contigsnp3461	118.18	Chr_0_contigsnp9585	170.87
Chr01_47914060_snp2329	163.8	Chr02_3663161_snp5989	128.95	Chr03_49511161_snp12260	153.76	Chr04_5299507_snp12074	118.44	Chr_0_contigsnp11291	137.9	Chr06_27707249_snp810	151.52	Chr07_35974956_snp1140	103.44	Chr08_4182684_snp3014	120.65	Chr_0_contigsnp5414	125.28	Chr10_40433192_snp119	124.59	Chr11_3207881_snp3398	182.27
Chr01_47721498_snp1848	169.78	Chr02_3653697_snp8617	132.1	Chr03_49651386_snp435	156.28	Chr04_5211278_snp10827	121.26	Chr05_37387196_snp6579	141.7	Chr06_27398130_snp5937	152.77	Chr07_35501104_snp5741	107.9	Chr08_4371771_snp2058	124.77	Chr09_15562385_snp3178	130.05	Chr10_40190962_snp2627	130.01	Chr11_3756580_snp597	198.33
Chr01_47645324_snp3101	177.74	Chr02_3629044_snp5457	133.66	Chr_0_contigsnp3066	158.8	Chr04_5045180_snp5743	125.05	Chr05_36905647_snp10646	144.21	Chr_0_contigsnp4447	154.33	Chr07_35815329_snp96	109.78	Chr_0_contigsnp8879	128.57	Chr09_15655603_snp646	135.15	Chr10_40108358_snp8210	133.17	Chr11_3312985_snp8504	211.1
Chr01_47590317_snp325	182.98	Chr02_3664843_snp11042	134.88	Chr03_49333395_snp3323	161.63	Chr04_5016343_snp1998	128.51	Chr05_36668913_snp3239	146.72	Chr06_27342267_snp346	159.47	Chr07_34997128_snp884	112.62	Chr08_4965386_snp6176	133.02	Chr09_15712417_snp8510	139.27	Chr10_39995457_snp557	137.74	Chr11_3259876_snp4206	217.58
Chr01_47459138_snp364	184.86	Chr02_3664978_snp8623	138.49	Chr03_49159615_snp5181	163.19	Chr04_4128140_snp847	134.25	Chr05_36687744_snp172	150.84	Chr06_27173567_snp1469	166.61	Chr07_34800638_snp741	115.45	Chr08_5340854_snp2632	138.14	Chr09_16132586_snp2215	143.39	Chr10_39723620_snp10140	145.38	Chr11_3453959_snp11079	219.15
Chr01_47407597_snp7063	186.74	Chr02_3902734_snp3552	143.45	Chr03_48622879_snp5427	164.75	Chr04_4257359_snp11939	136.44	Chr05_35160913_snp1453	157.61	Chr06_27149976_snp1113	173.08	Chr_0_contigsnp5776	118.61	Chr08_5441052_snp11985	139.7	Chr09_16125757_snp4160	145.9	Chr10_39723554_snp1212	150.81	Chr11_3478127_snp6997	221.03
Chr01_47353925_snp957	191.52	Chr02_3926849_snp15	146.59	Chr03_48728528_snp5020	166.63	Chr04_3812634_snp5855	138.01	Chr05_36108500_snp5873	167.16	Chr_0_contigsnp8887	176.57	Chr07_34535922_snp917	121.77	Chr08_5691770_snp667	144.16	Chr09_16259863_snp3600	149.05	Chr10_39738894_snp5046	152.06	Chr11_3567188_snp10858	224.51
Chr01_47368713_snp3993	196.95	Chr02_4017902_snp2742	147.84	Chr03_48482765_snp6865	169.46	Chr_0_contigsnp10825	139.57	Chr05_12163460_snp1390	176.71	Chr06_26793406_snp1228	180.71	Chr07_34211947_snp6547	125.98	Chr08_6712649_snp2364	152.31	Chr09_16780016_snp785	154.47	Chr10_39334101_snp04	153.62	Chr11_3646388_snp4423	227.68
Chr01_47118158_snp5654	203.38	Chr02_4422253_snp1773	149.41	Chr03_48346852_snp2464	173.59	Chr04_3196575_snp9526	140.81	Chr05_14927401_snp1579	182.14	Chr06_26745178_snp3059	188.19	Chr07_34168635_snp1761	131.18	Chr08_6380025_snp8916	157.76	Chr09_17428667_snp3677	157.94	Chr10_39107543_snp11210	155.5	Chr11_3663020_snp2100	230.2
Chr01_46950008_snp701	208.49	Chr02_4359288_snp3343	152.24	Chr03_47836777_snp4113	181.7	Chr04_3200604_snp7950	141.74	Chr05_25758821_snp2301	184.65	Chr06_26423472_snp805	194.33	Chr07_33913820_snp3210	136.3	Chr08_6642766_snp11683	158.7	Chr09_18041543_snp2693	160.45	Chr_0_contigsnp5527	158.33	Chr_0_contigsnp3889	234.34
Chr01_46854453_snp1881	212.95	Chr02_4294077_snp1594	156.68	Chr_0_contigsnp5090	189.12	Chr04_3454386_snp10344	145.53	Chr05_31230288_snp5371	185.9	Chr06_26290143_snp5024	197.17	Chr07_33399997_snp9311	138.81	Chr08_6868604_snp7841	159.95	Chr09_17530161_snp7243	164.7	Chr_115127_scaffold59snp6636	164.77	Chr11_3987608_snp3535	237.5
Chr01_46736597_snp3932	216.1	Chr02_4421074_snp1528	160.48	Chr03_47766961_snp138	192.59	Chr04_2860174_snp768	153.97	Chr05_31191876_snp11464	186.83	Chr06_26238587_snp5642	200.33	Chr_0_contigsnp4970	140.37	Chr08_8890026_snp11781	169.18	Chr09_18302648_snp2474	171.18	Chr_81366_scaffold59snp463	172.22	Chr11_4094331_snp472	238.75
Chr01_46617378_snp9211	220.56	Chr02_4381330_snp2182	162.84	Chr03_47944812_snp2710	193.52	Chr04_2862128_snp11182	157.44	Chr05_32733448_snp7877	189.33	Chr06_26077225_snp6812	204.8	Chr07_33119027_snp10406	141.3	Chr08_9053545_snp684	174.63	Chr09_18218224_snp624	175.81	Chr10_37121229_snp10674	176.67	Chr11_4315400_snp1835	240.32
Chr01_46588920_snp1687	223.72	Chr02_4878091_snp322	167.26	Chr_0_contigsnp10991	194.77	Chr04_2546876_snp10177	165.24	Chr05_30970177_snp11463	191.21	Chr06_26003849_snp2211	212.29	Chr07_33115630_snp6640	143.18	Chr08_13622388_snp10358	180.23	Chr09_18797172_snp2936	179.62	Chr10_37110616_snp1116	177.29	Chr11_4294350_snp10179	244.46
Chr01_46298914_snp249	228.82	Chr02_4016866_snp97	172.16	Chr03_47731336_snp2609	197.09	Chr04_2395185_snp12013	169.05	Chr05_11079666_snp982	191.83	Chr06_25851183_snp2114	217.41	Chr07_32658845_snp2203	146.33	Chr08_14023096_snp4012	186.57	Chr09_19108919_snp5667	180.55	Chr10_37048336_snp3857	178.23	Chr11_4439415_snp6721	249.92
Chr01_46198638_snp2340	235.98	Chr02_4121766_snp5668	175.06	Chr03_47235273_snp10264	200.43	Chr04_2327020_snp9746	170.3	Chr05_11806620_snp5866	193.08	Chr06_25736784_snp1945	224.02	Chr07_32772618_snp588	148.21	Chr08_13513148_snp1659	191.31	Chr09_19091481_snp5749	180.87	Chr10_36755777_snp1168	179.79	Chr11_4656238_snp1876	255.76
Chr01_46176764_snp11666	241.74	Chr02_4318361_snp10865	176.94	Chr03_46835319_snp9108	202.31	Chr04_2272161_snp4396	171.86	Chr05_11216880_snp2375	196.55	Chr06_25709289_snp8539	233.83	Chr07_32290068_snp3737	151.37	Chr_0_contigsnp9335	192.87	Chr09_19107775_snp1002	183.06	Chr10_36496731_snp6749	181.98	Chr11_4663804_snp7762	267.97
Chr01_45530392_snp6714	250.51	Chr02_4848053_snp4493	178.49	Chr03_46466519_snp9891	203.87	Chr04_1617988_snp6408	180.01	Chr05_23187363_snp424	200.99	Chr06_25529482_snp3647	244.81	Chr_0_contigsnp5951	153.57	Chr08_12993946_snp9198	194.75	Chr09_19421698_snp1870	188.83	Chr10_36695335_snp4101	184.81	Chr11_4700862_snp3578	276.93
Chr01_45616931_snp1865	257.05	Chr02_4998965_snp10354	180.04	Chr03_46531159_snp1340	204.8	Chr_0_contigsnp12170	183.49	Chr05_4843403_snp2968	207.07	Chr06_25613118_snp5802	253.67	Chr07_32611203_snp9035	154.51	Chr08_12993998_snp52	197.27	Chr09_19778981_snp953	194.26	Chr10_35795027_snp4279	187.63	Chr11_4827465_snp10075	279.45
Chr01_45705456_snp8095	262.7	Chr02_6243785_snp6626	182.56	Chr03_46091559_snp4491	206.68	Chr_0_contigsnp4594	186.33	Chr05_5980766_snp2872	213.15	Chr06_25238042_snp8871	254.92	Chr07_32263931_snp3164	156.38	Chr08_48258452_snp6193	199.46	Chr09_20132959_snp6459	196.46	Chr10_35960574_snp3853	188.56	Chr11_4894360_snp6653	281.64
Chr01_45392118_snp1806	265.32	Chr02_8060664_snp8214	185.07	Chr03_46034471_snp6666	212.11	Chr04_486794_snp2492	195.48	Chr05_4432973_snp11628	216.62	Chr06_25195936_snp9853	256.49	Chr07_32090447_snp592	160.51	Chr08_26940191_snp9264	200.71	Chr_0_contigsnp9586	198.97	Chr10_36453900_snp872	188.87	Chr11_4956421_snp5534	283.21
Chr01_45356215_snp845	269.61	Chr_0_contigsnp329	188.22	Chr03_45813897_snp1264	216.89	Chr04_477217_snp1327	205.22	Chr05_4081795_snp1144	219.13	Chr06_25080693_snp276	259.65	Chr07_32056485_snp3643	170.05	Chr08_41879734_snp6748	202.9	Chr09_21164786_snp1060	203.74	Chr10_32918964_snp1073	190.44	Chr11_5214313_snp4904	287.35
Chr01_44960090_snp2312	274.24	Chr02_11637097_snp3303	192.99	Chr03_45065289_snp432	220.04	Chr04_1182084_snp12782	210.47	Chr05_3949464_snp4150	223.24	Chr06_24830737_snp2873	266.44	Chr_0_contigsnp5517	179.97	Chr08_36213724_snp3626	205.56	Chr09_21324069_snp11274	207.54	Chr10_33547669_snp5130	192.95	Chr11_5531531_snp3330	293.48
Chr01_45005462_snp1383	276.76	Chr02_13197515_snp5337	196.14	Chr03_45229213_snp10044	222.55	Chr04_816576_snp12129	215.25	Chr_0_contigsnp4949	228.01	Chr06_24712483_snp3540	274	Chr07_31803669_snp8954	182.81	Chr08_53686527_snp1700	208.89	Chr09_21366245_snp1226	210.7	Chr10_30196856_snp3942	195.78	Chr11_5767807_snp3069	300.94
Chr_0_contigsnp4893	279.68	Chr02_13667991_snp2758	197.7	Chr_0_contigsnp6120	223.48	Chr04_78013_snp266	223.74	Chr05_3462666_snp2262	231.16	Chr_0_contigsnp655	278.73	Chr07_30910550_snp2452	186.3	Chr08_51070149_snp4045	211.73	Chr_0_contigsnp9334	216.14	Chr10_30699926_snp1597	199.25	Chr_0_contigsnp5671	307.71
Chr01_45099937_snp3096	287.38	Chr02_13979814_snp11198	198.95	Chr03_44548545_snp10667	225.03	Chr04_108201_snp3562	228.54	Chr05_3273616_snp9962	235.28	Chr06_24069364_snp1070	284.87	Chr07_30580048_snp2960	192.08	Chr08_44258742_snp1363	213.93	Chr09_22354190_snp3490	223.56	Chr10_7728766_snp6278	204.03	Chr11_5991104_snp3007	317.2
Chr01_44386395_snp9412	294.83	Chr02_15945940_snp10090	200.19	Chr03_44139607_snp2295	226.59	Number of markers: 60		Chr_0_contigsnp5112	239.72	Chr06_24168330_snp3366	291.67	Chr07_30169329_snp1302	197.55	Chr08_30757679_snp6926	216.44	Chr09_22333926_snp6669	228.34	Chr10_7277836_snp1524	207.83	Chr11_5991829_snp3967	326.01
Chr01_44027395_snp3666	300.94	Chr02_17399294_snp8301	201.74	Chr03_44105124_snp8304	228.78	Log-likelihood: -2839.12		Chr05_2962470_snp10322	243.2	Chr06_23798000_snp6042	295.15	Chr07_30008288_snp5809	199.11	Chr08_32087539_snp9062	217.69	Chr09_22736997_snp2821	230.85	Chr10_6812777_snp1489	210.98	Chr11_6525452_snp3770	331.46
Chr01_44146794_snp4425	306.72	Chr02_20811480_snp10934	203.29	Chr03_43878139_snp9645	233.55			Chr05_2916711_snp8857	246.99	Chr06_23586496_snp1794	297.67	Chr07_29880751_snp6188	201.63	Chr08_52962538_snp7070	218.61	Chr09_23488570_snp5184	232.73	Chr10_6309203_snp5102	213.5	Chr11_1919207_snp5073	333.97
Chr01_44125479_snp3011	309.55	Chr02_21012633_snp2786	204.22	Chr03_43524101_snp8157	238.99			Chr05_2778002_snp10038	248.87	Chr06_23301079_snp11049	300.51	Chr07_29862290_snp4268	209.98	Chr08_52664081_snp520	220.49	Chr09_23944144_snp7025	234.29	Chr10_6060378_snp9502	220.56	Chr_0_contigsnp10150	336.81
Chr01_44156510_snp861	310.79	Chr_0_contigsnp1129	206.1	Chr03_43360545_snp4006	241.82			Chr05_2729126_snp10597	250.42	Chr06_23261086_snp823	306.63	Chr07_28443427_snp927	220.12	Chr08_51951737_snp3409	226.23	Chr09_23812940_snp22	237.44	Chr10_3178793_snp280	231.62	Chr11_6964160_snp11489	338.69
Chr01_44146728_snp451	312.35	Chr_0_contigsnp5669	209.89	Chr03_43319670_snp228	243.07			Chr05_2616136_snp1648	253.24	Chr06_22969808_snp3499	313.75	Chr07_29141620_snp3089	223.6	Chr08_47335170_snp4171	236.06	Chr09_24646173_snp4999	242.21	Chr_0_contigsnp9120	235.1	Chr11_7698957_snp327	342.49
Chr01_44032225_snp9218	314.55	Chr02_22526764_snp1541	214.65	Chr03_43026312_snp5698	245.26			Chr05_2512054_snp7470	256.39	Chr06_22930239_snp4078	318.55	Chr07_28778350_snp1404	226.12	Chr08_47833732_snp2031	244.7	Chr09_24427324_snp7574	247.31	Chr10_1581655_snp2537	238.58	Chr_5605_scaffold240snp1265	349.62
Chr_0_contigsnp5190	316.42	Chr02_22527573_snp1475	219.42	Chr03_42598487_snp11452	247.14			Chr_0_contigsnp9350	259.54	Chr06_22992523_snp2225	322.53	Chr_0_contigsnp6880	227.88	Chr08_29246560_snp4550	254.22	Chr09_25546440_snp2064	252.08	Chr10_2021290_snp11865	243.7	Chr11_8657479_snp6825	356.4
Chr01_43426547_snp8858	317.67	Chr02_23578888_snp10008	222.9	Chr03_42598270_snp5273	249.01			Chr05_2110904_snp2875	264.3	Chr06_22731688_snp8078	325.84	Chr07_28137892_snp10442	228.92	Chr08_20992083_snp12101	265.42	Chr09_25120431_snp8352	255.88	Chr10_3311040_snp8203	249.81	Chr11_8843628_snp10856	359.56
Chr01_43500262_snp6638	319.55	Chr02_27017830_snp4495	225.09	Chr03_42147039_snp10385	251.52			Chr05_2111203_snp5789	266.5	Chr06_22495835_snp42	328.04	Chr07_27920223_snp10550	231.76	Chr08_54888965_snp1841	276.62	Chr09_25749686_snp367	261.3	Chr10_3307120_snp13037	254.59	Chr11_8148163_snp8298	362.08
Chr01_43118244_snp1134	324.01	Chr02_26077828_snp2195	227.6	Chr03_42003787_snp3315	254.68			Chr05_1958484_snp1646	268.38	Chr_0_contigsnp6008	332.83	Chr07_27768306_snp2568	236.02	Chr_0_contigsnp5488	284.57	Chr09_25828154_snp12292	263.82	Chr10_4671091_snp9553	257.43	Chr11_8972965_snp8225	369.87
Chr01_43047735_snp2904	328.46	Chr02_28434590_snp9205	228.53	Chr03_42057446_snp8477	258.15			Chr05_1808588_snp11804	270.57	Chr06_22264280_snp9794	338.63	Chr07_27033716_snp11867	243.43	Chr08_55815020_snp7853	289.04	Chr09_26194023_snp3215	266.01	Chr10_4627811_snp7672	262.21	Chr11_37693547_snp6885	374.21
Chr01_43495852_snp2181	337.26	Chr02_29411172_snp10823	229.46	Chr03_41564994_snp8028	262.91			Chr05_1647245_snp11803	273.72	Chr06_22263928_snp2382	345.12	Chr07_26754479_snp784	251.31	Chr08_55630794_snp7087	294.17	Chr09_26667764_snp4325	269.81	Chr10_3785145_snp11542	268.94	Chr11_10891757_snp3854	382.45
Chr01_42638915_snp3948	348.85	Chr02_25217107_snp10219	231.01	Chr03_40750245_snp1085	268.01			Chr05_1419119_snp2020	279.13	Chr06_21506681_snp7456	353.32	Chr07_25762274_snp3589	254.47	Chr08_56027865_snp4466	298.63	Chr_0_contigsnp5399	272	Chr10_3685085_snp4510	277.14	Chr11_10890818_snp162	385.29
Chr01_42688852_snp860	354.77	Chr02_24858855_snp2529	231.95	Chr03_40408283_snp3388	272.12			Chr05_1313266_snp3415	283.25	Chr06_21313551_snp259	357.13	Chr07_25743739_snp7685	255.09	Chr_0_contigsnp6015	301.97	Chr09_26791155_snp8556	272.31	Number of markers: 74		Chr_0_contigsnp5165	386.54
Chr01_40083402_snp301	362.07	Chr02_25166689_snp1758	232.87	Chr03_40356462_snp973	275.6			Chr05_1184014_snp892	286.08	Chr06_21313617_snp3448	363.91	Chr07_24917157_snp737	256.03	Chr08_56360768_snp9065	304.64	Chr09_27890010_snp12212	272.94	Log-likelihood: -3450.35		Chr11_13599464_snp7642	388.1
Chr01_40571204_snp6452	370.05	Chr02_25847686_snp10444	234.11	Chr03_40098967_snp4434	278.43			Chr05_1152673_snp7366	292.31	Chr06_21282885_snp1155	374.48	Chr07_23873808_snp3003	261.48	Chr08_56969575_snp80	307.16	Chr09_28122777_snp5061	273.55			Chr11_11730647_snp6022	393.06
Chr01_41132335_snp7606	377.33	Chr02_24949841_snp7525	234.73	Chr03_39233072_snp3858	282.54			Number of markers: 77		Chr06_20093133_snp5089	380.92	Chr07_12047444_snp1414	266.61	Chr08_57092262_snp928	309.67	Chr09_28253207_snp2038	274.79			Chr11_11606235_snp125	397.68
Chr01_40486597_snp813	387.17	Chr02_26728133_snp3727	237.24	Chr03_39619999_snp2025	284.73			Log-likelihood: -3662.73		Chr06_20658087_snp1507	386.38	Chr07_12179355_snp7316	269.77	Chr08_57384239_snp4332	311.23	Chr09_28627032_snp5367	276.99			Chr11_14342353_snp7105	399.24
Chr01_40194336_snp4262	395.29	Chr02_26291192_snp863	242.83	Chr03_39742605_snp4260	287.56					Chr06_20688911_snp4074	390.19	Chr07_11977356_snp6030	271.97	Chr08_57194867_snp4144	317.36	Chr09_29068179_snp3157	281.1			Chr11_14263150_snp4296	400.8
Chr01_42105654_snp11824	403.97	Chr02_28954170_snp2748	248.76	Chr03_39585262_snp333	290.07					Chr06_20417385_snp11916	392.07	Chr07_10383651_snp426	276.77	Chr08_57280012_snp3500	328.64	Chr09_29468026_snp3074	285.55			Chr11_14692667_snp9308	402.04
Chr01_42311904_snp9797	409.55	Chr02_30866789_snp3867	253.21	Chr03_39534586_snp11111	291					Chr_0_contigsnp5933	396.21	Chr07_9774532_snp972	282.56	Chr08_57440976_snp415	335.78	Chr09_29468264_snp8126	288.7			Chr11_15078832_snp3100	402.35
Chr_0_contigsnp10959	411.43	Chr_0_contigsnp10972	255.4	Chr03_38113425_snp3193	292.53					Chr06_20084823_snp2258	406.27	Chr_0_contigsnp5622	285.39	Chr08_57496887_snp8631	337.98	Chr09_30374741_snp232	294.14			Chr11_15250231_snp10461	402.66
Chr01_41672357_snp14	412.67	Chr02_30320681_snp10338	256.34	Chr03_37393613_snp10866	294.09					Chr06_19859413_snp6806	415.62	Chr07_9356802_snp20	286.32	Chr_0_contigsnp5460	340.5	Chr09_29988349_snp116	297.29			Chr11_30297851_snp11635	403.59
Chr01_39446069_snp5092	414.23	Chr02_26927596_snp4058	260.13	Chr03_37085764_snp753	295.96					Chr06_19941307_snp66	421.42	Chr07_9329582_snp7198	287.57	Chr08_57864281_snp3934	343.34	Chr09_30543704_snp4212	298.53			Chr11_30716388_snp3233	404.83
Chr01_38591349_snp6097	415.48	Chr02_31555333_snp938	266.54	Chr03_36500271_snp8579	300.08					Chr06_19164338_snp8299	425.55	Chr07_8633367_snp3141	289.45	Chr08_53260737_snp3306	349.96	Chr09_30782487_snp2596	300.41			Chr11_44395110_snp37	406.71
Chr_0_contigsnp5229	416.71	Chr02_31437474_snp6485	270.66	Chr03_36342215_snp9024	303.23					Chr06_18743470_snp11705	428.71	Chr_0_contigsnp5369	291.01	Chr08_53389251_snp3163	356.58	Chr09_31013617_snp580	302.6			Chr11_42748984_snp4032	408.27
Chr01_40066268_snp5413	417.64	Chr_0_contigsnp539	272.86	Chr03_35953876_snp11504	305.11					Chr06_19127949_snp1224	431.54	Chr07_8174549_snp1385	293.83	Chr08_58506704_snp7734	362.69	Chr09_31323133_snp10910	306.72			Chr11_38370400_snp581	410.79
Chr01_38612096_snp583	418.89	Chr02_32438328_snp6727	276.65	Chr03_35334891_snp692	306.66					Chr_0_contigsnp5549	432.78	Chr07_7899715_snp27	296.35	Chr08_58401812_snp8104	366.49	Chr09_31383306_snp9268	310.52			Chr11_36386431_snp7121	414.92
Chr01_36985483_snp9795	423.67	Chr_588658_scaffold17snp365	279.8	Chr03_35203719_snp3570	309.6					Chr06_18887643_snp2112	433.71	Chr07_7742557_snp765	298.23	Chr08_58430086_snp7718	370.94	Chr_0_contigsnp10888	311.77			Chr11_40680320_snp9942	420.37
Chr01_35315019_snp1859	427.15	Chr02_33577531_snp1314	283.27	Chr03_33540606_snp8379	315.24					Chr06_18853710_snp12386	434.33	Chr07_7384050_snp2073	300.74	Chr08_58829797_snp8651	378.39	Chr09_31898628_snp2589	314.92			Chr11_41090265_snp12583	430.61
Chr01_36805824_snp1974	428.39	Chr02_33555129_snp1253	288.37	Chr03_34376352_snp466	320.01					Chr06_18882006_snp5167	435.25	Chr07_7039167_snp3180	303.9	Chr08_58964507_snp1681	382.52	Chr09_32265446_snp7451	318.72			Chr11_45734948_snp8062	441.56
Chr01_34154068_snp622	429.95	Chr02_34257163_snp2980	296.14	Chr03_34480110_snp1057	322.84					Chr06_18498375_snp11859	440.04	Chr07_6925900_snp2681	308.35	Chr08_59252138_snp341	387.29	Chr_0_contigsnp5692	322.84			Chr11_45113805_snp1892	448.67
Chr01_33455833_snp1644	431.82	Chr02_34721554_snp6474	300.26	Chr03_32121844_snp9607	325.67					Chr06_18288130_snp3470	447.7	Chr07_6308191_snp3516	314.13	Chr08_59176568_snp9982	389.17	Chr09_32924896_snp4417	324.72			Chr11_44557896_snp8282	452.73
Chr01_18948524_snp9413	433.38	Chr02_35024902_snp879	302.14	Chr03_32669346_snp6491	327.86					Chr06_18050055_snp2087	452.95	Chr07_5809928_snp7976	317.62	Chr08_59274216_snp3374	390.09	Chr09_33056047_snp7867	327.55			Chr11_45090229_snp8633	456.15
Chr_0_contigsnp5580	434.62	Chr02_35387994_snp2441	305.29	Chr03_32329192_snp2077	330.06					Chr06_18070453_snp1554	455.79	Chr07_5961440_snp2978	321.42	Chr_0_contigsnp6889	391.34	Chr09_33314857_snp5266	329.74			Chr_0_contigsnp10557	459.3
Chr01_12975738_snp5235	435.86	Chr02_35437880_snp2163	310.58	Chr03_31428865_snp3621	335.3					Chr06_18301825_snp7401	457.99	Chr07_5884353_snp11766	324.9	Chr08_59816043_snp5702	392.89	Chr09_33442471_snp841	334.51			Chr11_46181412_snp9460	462.78
Chr01_13124290_snp7495	436.48	Chr02_35437243_snp5001	314.18	Chr03_31414609_snp2877	343.83					Chr06_18280187_snp6608	461.47	Chr07_5317111_snp6484	327.73	Chr08_59995868_snp2165	394.45	Chr09_33586457_snp9031	338.63			Chr11_46913027_snp2194	466.27
Chr01_13856189_snp2787	437.72	Chr02_35927110_snp951	316.05	Chr03_31373502_snp7159	350.76					Chr06_18014473_snp203	470.51	Chr07_4913375_snp2438	329.61	Chr08_60187490_snp4507	397.6	Chr09_33665121_snp8047	340.82			Chr11_46840644_snp9327	471.52
Chr01_25539468_snp9779	440.23	Chr02_36109252_snp7345	317.28	Chr03_30830631_snp6511	356.18					Chr06_17934267_snp2298	477.94	Chr07_4325052_snp10507	331.17	Chr08_60287357_snp50	400.12	Chr09_33807397_snp9535	341.74			Chr11_47925715_snp9948	479.79
Chr01_33943508_snp3708	445.68	Chr02_36251686_snp489	319.16	Chr03_30047024_snp1425	361.6					Chr06_17514588_snp2744	487.3	Chr07_4325240_snp1959	333.37	Chr08_61178349_snp11287	410.34	Chr_0_contigsnp7421	342.67			Chr11_47037732_snp4548	492.71
Chr01_32470646_snp8185	453.48	Chr02_36267632_snp3879	322.95	Chr_0_contigsnp8894	363.16					Chr06_17574027_snp11283	493.74	Chr07_4004502_snp12797	335.88	Chr08_61237394_snp9697	415.12	Chr09_34056439_snp6656	344.23			Chr11_47623903_snp1979	503.81
Chr01_28356145_snp8551	459.25	Chr02_36353459_snp2569	326.74	Chr03_13549977_snp2189	364.71					Chr_0_contigsnp5842	495.62	Chr07_3960937_snp2917	337.44	Chr08_61408701_snp2014	419.89	Chr09_34126686_snp1084	346.42			Chr11_48372762_snp3447	508.27
Chr01_26157175_snp1828	464.36	Chr02_36867708_snp12078	328.29	Chr03_14734313_snp12759	365.64					Chr06_17961629_snp113	498.13	Chr07_3960871_snp6713	339	Chr08_61662321_snp5350	420.82	Chr09_34582586_snp12587	348.61			Chr11_48470655_snp4251	510.15
Chr01_10602118_snp1939	471.8	Chr_0_contigsnp8863	329.85	Chr03_10077154_snp9910	366.88					Chr06_17321505_snp991	501.28	Chr07_3655944_snp6654	341.84	Chr08_61918725_snp11377	422.7	Chr09_34688687_snp7512	349.54			Chr11_48786287_snp9231	513.31
Chr01_9281889_snp1391	479.15	Chr02_37263069_snp5780	332.04	Chr03_10856297_snp816	369.19					Chr_0_contigsnp9560	506.07	Chr07_3840020_snp6533	346.31	Chr08_61888757_snp641	425.53	Chr09_34696575_snp7799	351.42			Chr11_49025116_snp9935	516.15
Chr01_8535427_snp6715	484.51	Chr02_37616750_snp2542	333.91	Chr03_7930606_snp2624	372.85					Chr06_17031689_snp2246	509.88	Chr07_4000572_snp12365	358.06	Chr08_62081768_snp1807	429.65	Chr09_35017060_snp1814	357.17			Chr11_48931280_snp5477	520.62
Chr01_7779363_snp9229	487.02	Chr02_38213716_snp738	336.1	Chr03_6909717_snp2214	376.32					Chr06_16642779_snp11128	513.03	Chr07_4267446_snp6599	372.91	Chr08_62201631_snp9267	432.8	Chr09_35409981_snp302	366.29			Chr11_48902843_snp2413	526.06
Chr01_7764667_snp829	490.38	Chr02_38245936_snp3884	337.66	Chr03_6844720_snp2307	377.26					Chr06_16625306_snp11190	513.97	Chr07_3686644_snp9830	386.28	Chr08_62278459_snp8697	435.31	Chr09_35570579_snp12191	369.45			Chr_0_contigsnp6314	534.96
Chr01_7724715_snp361	492.37	Chr02_38571492_snp1088	339.21	Chr03_6511010_snp902	380.41					Chr06_16421094_snp6173	515.53	Chr07_3703472_snp11132	393.17	Chr08_62389452_snp4138	439.11	Chr09_35713762_snp1647	371.96			Chr_0_contigsnp9694	548.71
Chr01_7501367_snp11475	493.3	Chr02_38574796_snp6828	340.77	Chr03_6080420_snp7861	384.85					Chr06_16373980_snp6558	519.01	Chr07_3419851_snp9903	396.97	Chr08_62395167_snp9984	441.94	Chr09_35935551_snp1389	377.57			Chr11_50191669_snp5409	560.31
Chr01_7288569_snp81	494.23	Chr02_39954672_snp5170	342.01	Chr03_5998787_snp2135	389.61					Chr06_16271123_snp7092	523.88	Chr07_3329682_snp8235	400.13	Chr08_62525279_snp11275	446.71	Chr09_36078767_snp7230	382.5			Chr11_50009095_snp289	566.21
Chr01_6946328_snp2678	496.11	Chr02_40638628_snp680	345.8	Chr_0_contigsnp5349	392.76					Chr06_16649228_snp1174	530.21	Chr07_3169176_snp7923	403.93	Chr08_62572124_snp10281	451.15	Chr09_35942715_snp10361	383.12			Chr11_51696483_snp2660	571.34
Chr01_7693580_snp2252	504.27	Chr02_40993346_snp226	349.26	Chr03_5037106_snp3632	395.91					Chr06_16158195_snp3776	542.37	Chr07_3194721_snp3710	409.36	Chr08_62645111_snp11750	453.03	Chr_0_contigsnp1635	384.68			Chr11_51886961_snp6932	575.81
Chr01_6550261_snp3217	514.08	Chr02_41265906_snp9072	351.46	Chr03_4980357_snp1234	398.42					Chr06_15844903_snp2657	555.53	Chr_0_contigsnp5868	414.8	Chr08_62630622_snp11697	457.96	Chr09_36482340_snp9055	388.48			Chr_0_contigsnp1435	580.27
Chr_0_contigsnp9647	519	Chr02_41365511_snp3920	351.77	Chr03_4973638_snp2032	402.22					Chr06_15973112_snp7713	561.65	Chr07_3064881_snp2532	417	Chr08_62727137_snp8287	468.55	Chr09_36795421_snp940	391.31			Chr11_52195251_snp5080	583.11
Chr01_6510426_snp11563	521.2	Chr02_41024821_snp3389	352.37	Chr_0_contigsnp7100	407.65					Chr06_15873518_snp11758	562.58	Chr07_3015485_snp7906	420.8	Chr08_62734846_snp1403	472.34	Chr09_36619666_snp439	395.12			Chr_0_contigsnp3946	585.63
Chr_0_contigsnp5060	523.08	Chr02_41419790_snp7167	352.97	Chr03_4152102_snp1108	413.75					Chr_0_contigsnp6792	563.2	Chr07_2895889_snp2586	426.91	Chr08_62721370_snp10402	473.9	Chr09_36619600_snp1673	404.51			Chr11_52829968_snp7971	589.11
Chr01_6454578_snp959	526.88	Chr02_41606433_snp7184	353.9	Chr03_3971566_snp1973	417.54					Chr06_15080267_snp2538	565.39	Chr07_2866273_snp1820	429.74	Chr_0_contigsnp5927	475.46	Chr09_36881824_snp2478	415.72			Chr11_53099362_snp169	594.57
Chr01_5998571_snp4615	531.99	Chr02_41749615_snp2390	355.14	Chr03_3897839_snp818	420.06					Chr06_14963325_snp8212	569.84	Chr07_2571083_snp2056	433.22	Chr08_62754013_snp2988	477.02	Chr09_37065961_snp11753	420.18			Chr11_53429330_snp53	598.39
Chr_0_contigsnp1837	539.81	Chr02_41808275_snp5106	356.38	Chr03_3329365_snp2535	429.92					Chr06_14799490_snp2724	575.27	Chr07_2571315_snp9206	436.06	Chr08_62939668_snp1546	480.16	Chr09_37174495_snp5288	423.02			Chr11_53436885_snp10926	600.27
Chr_0_contigsnp6320	547.63	Chr02_41797128_snp10476	357.93	Chr03_3352414_snp1925	435.01					Chr06_14671650_snp9848	580.38	Chr07_2452622_snp6919	438.25	Chr08_63011117_snp7822	485.58	Chr09_37222661_snp6163	425.85			Chr11_53477502_snp11719	602.47
Chr01_4737353_snp12482	550.15	Chr02_42073091_snp236	359.17	Chr_0_contigsnp8525	437.52					Chr_0_contigsnp5880	583.86	Chr07_2401021_snp2239	442.05	Number of markers: 122		Chr09_37991626_snp8513	431.65			Chr11_53538205_snp3986	605.31
Chr01_5045781_snp6908	552.99	Chr02_42209801_snp11588	360.73	Chr03_2900943_snp11560	439.08					Chr06_14194295_snp926	587.98	Chr07_2178933_snp3439	447.17	Log-likelihood: -5743.17		Chr09_37754150_snp5722	435.15			Number of markers: 123
Chr01_5003367_snp802	559.06	Chr02_42248991_snp8324	362.92	Chr03_2939382_snp3769	441.27					Chr06_14057976_snp3741	591.13	Chr07_2186371_snp11012	449.04			Chr09_37771411_snp5316	438.28			Log-likelihood: -6586.69
Chr01_4499632_snp1095	569.49	Chr02_42558520_snp1565	367.69	Chr03_2698447_snp8207	444.74					Chr06_5174906_snp2027	594.28	Chr07_1909019_snp1703	452.19			Chr09_37667224_snp1046	441.12
Chr01_4327402_snp2721	574.88	Chr02_42618714_snp11285	371.8	Chr03_2532833_snp3603	449.19					Chr06_4298536_snp1266	596.48	Chr07_1971012_snp6782	456			Chr09_37368190_snp1780	447.23
Chr01_4085905_snp1963	576.13	Chr02_42963805_snp6902	373.37	Chr03_2390315_snp1282	453.63					Chr06_10619386_snp821	599.31	Chr07_1623618_snp7898	460.46			Chr09_38192024_snp7007	463.21
Chr01_3725663_snp3043	578.96	Chr02_43129560_snp999	376.83	Chr03_1978565_snp6601	459.07					Chr06_4403442_snp5496	605.4	Chr07_1226025_snp4470	465.58			Number of markers: 128
Chr01_4629368_snp10698	583.42	Chr02_43317800_snp307	379.66	Chr03_1886025_snp4430	464.51					Chr06_512612_snp633	614.71	Chr07_867402_snp7755	471.35			Log-likelihood: -5721.03
Chr01_3516606_snp422	585.3	Chr02_43438494_snp4337	380.29	Chr03_1862048_snp3880	468.96					Chr06_203047_snp2859	626.51	Chr07_1829150_snp944	482.37
Chr01_3363630_snp7249	585.92	Chr02_43476736_snp3765	381.53	Chr03_1751953_snp11506	469.9					Number of markers: 131		Number of markers: 131
Chr01_3286701_snp12192	588.12	Chr02_43484760_snp5808	383.4	Chr03_1697389_snp2540	471.15					Log-likelihood: -7042.31		Log-likelihood: -5861.72
Chr01_3070504_snp283	593.55	Chr02_43885285_snp5133	386.23	Chr_0_contigsnp10814	476.26
Chr01_2989684_snp318	597.03	Chr02_43921025_snp1309	388.11	Chr03_1587024_snp6940	481.21
Chr01_2853275_snp3890	601.15	Chr02_44241809_snp230	389.67	Chr03_1509223_snp6609	485.81
Chr01_2647299_snp7102	606.1	Chr_0_contigsnp3538	391.54	Chr03_1477596_snp2571	492.23
Chr01_2478748_snp70	608.14	Chr02_44236738_snp7524	395.34	Chr_0_contigsnp10921	497.66
Chr01_2489092_snp1886	612.92	Chr02_43011207_snp4103	402.78	Chr03_1204606_snp10899	500.18
Chr01_2220386_snp8198	619.02	Chr02_44376116_snp4349	412.96	Chr03_1004069_snp7951	503.65
Chr01_1963054_snp5538	621.22	Chr02_44712141_snp8927	420.39	Chr03_1005303_snp4225	505.21
Chr01_1895407_snp6063	622.15	Chr02_44584478_snp827	424.19	Chr03_812065_snp6429	507.41
Chr01_1860592_snp8259	625.29	Chr_0_contigsnp9900	426.71	Chr03_104017_snp3686	510.39
Chr01_1649996_snp11175	629.74	Chr02_44885258_snp455	429.86	Chr03_472230_snp7000	514.05
Chr01_949920_snp1160	633.86	Chr02_44911687_snp1336	436.65	Chr03_551275_snp7836	518.5
Chr_0_contigsnp9391	636.06	Chr02_45239350_snp881	444.81	Chr03_429448_snp11035	522.3
Chr01_1507872_snp11034	637.61	Chr02_45461099_snp3006	448.61	Chr03_287463_snp12959	523.54
Chr01_863349_snp8067	640.77	Chr02_45786966_snp8246	451.45	Chr03_380818_snp12957	524.46
Chr_0_contigsnp11658	642.97	Chr02_45688984_snp887	454.92	Chr03_351221_snp2521	525.08
Chr01_150616_snp11851	648.08	Chr02_45960693_snp443	460.35	Chr03_7958_snp12606	526.33
Chr01_317314_snp3981	650.28	Chr02_46100837_snp1537	463.83	Chr03_31398_snp11317	527.26
Chr01_319379_snp10055	652.48	Chr02_46352555_snp8472	467.78	Chr03_45500_snp5516	529.14
Chr01_1848449_snp3915	664.91	Chr_0_contigsnp880	472.07	Chr03_183997_snp493	537.82
Number of markers: 153		Chr02_46482486_snp3642	473.94	Number of markers: 153
Log-likelihood: -7653.43		Chr02_46644130_snp01	475.19	Log-likelihood: -6669.11
		Chr02_47006480_snp5689	476.44
		Chr02_46967335_snp2894	479.91
		Chr02_47168978_snp3970	485.34
		Chr02_47253391_snp9777	488.17
		Chr02_47292159_snp8270	490.36
		Chr02_47505855_snp12289	492.56
		Chr02_47631763_snp6843	493.58
		Chr02_47806195_snp1509	496.01
		Number of markers: 163
		Log-likelihood: -6390.34
