# Supplementary material for: Genetic mapping of the Andean anthracnose resistance gene present in the common bean cultivar BRSMG Realce
Source: Front Plant Sci. 2022 Nov 14;13:1033687. doi: 10.3389/fpls.2022.1033687 (PMC9728541; doi:10.3389/fpls.2022.1033687)
Supplement: Supplementary file 10 [file Table_8.xlsx]

## Sheet: Supplementary_Table_7
Supplementary Table 8. Genetic map with 135 SNP and 111 DArT markers used in the interval refinement analysis of the major locus (Co-Realce) controlling anthracnose resistance in the Andean common bean cultivar BRSMG Realce. The underlined marks are those safely positioned using the LOD-score of 3.0 and the 'safe' function as ordering criteria.
Marker	Position, pb	Position, cM
Chr04_78013_snp266	78013	0
Chr04_108201_snp3562	108201	9.45
Chr04_38637_snp11994	38637	9.48
Chr04_152313_snp7332	152313	18.24
Chr04_143123_snp11422	143123	22.11
Chr04_495306_dart15389	495306	25.04
Chr04_816576_snp12129	816576	26.01
Chr04_812021_dart15774	812021	27.22
Chr04_345233_dart14088	345233	27.22
Chr04_324855_dart16151	324855	28.4
Chr04_487825_snp9435	487825	30.83
Chr04_237680_dart4949	237680	32.63
Chr04_1182084_dart16085	1182084	32.63
Chr04_1182084_snp12782	1182084	37.2
Chr04_507903_snp11894	507903	40.1
Chr04_916777_dart16086	916777	43.72
Chr04_1293563_dart11022	1293563	46.84
Chr04_714306_dart16076	714306	53.68
Chr04_485246_dart9817	485246	53.68
Chr04_432893_snp10195	432893	56.4
Chr04_505651_snp3308	505651	59.77
Chr04_477217_snp1327	477217	60.36
Chr04_486794_snp2492	486794	61.54
Chr04_1749234_dart10357	1749234	61.54
Chr04_1459874_dart317	1459874	66.34
Chr04_1372295_snp11880	1372295	72.29
Chr04_1991584_snp6424	1991584	74.66
Chr04_1674485_dart13430	1674485	76.07
Chr04_1990110_snp10425	1990110	78.44
Chr04_1743652_dart16072	1743652	79.37
Chr04_1419087_snp5641	1419087	79.37
Chr04_1617988_snp6408	1617988	80.41
Chr04_2108445_dart5361	2108445	80.92
Chr04_2272161_snp4396	2272161	80.92
Chr04_2276788_snp7101	2276788	81.44
Chr04_2303463_snp9885	2303463	83.02
Chr04_2297570_snp6914	2297570	84.07
Chr04_2303529_snp9548	2303529	85.15
Chr04_2327020_snp9746	2327020	85.83
Chr04_2272161_dart10202	2272161	87.87
Chr04_2357028_snp2617	2357028	88.79
Chr04_2395185_snp12013	2395185	89.72
Chr04_2546876_snp10177	2546876	93.51
Chr04_2767815_snp4314	2767815	96.33
Chr04_2778583_snp2613	2778583	97.58
Chr04_2862128_snp11182	2862128	99.45
Chr04_2862194_snp10594	2862194	99.45
Chr04_2860174_snp768	2860174	103.32
Chr04_3012290_dart6204	3012290	107.98
Chr04_3454386_snp10344	3454386	111.77
Chr04_3539233_dart10887	3539233	113.12
Chr04_3026374_dart13522	3026374	114.89
Chr04_3200604_dart13095	3200604	117.56
Chr04_3200604_snp7950	3200604	119.37
Chr04_3196575_snp9526	3196575	121.4
Chr04_3326593_snp10953	3326593	124.95
Chr04_3812634_snp5855	3812634	124.95
Chr04_3923830_snp9353	3923830	128.52
Chr04_4001115_snp5953	4001115	130.68
Chr04_3521439_dart5797	3521439	132.66
Chr04_4228272_dart12059	4228272	136.44
Chr04_3782333_dart4868	3782333	136.44
Chr04_3509238_dart5997	3509238	136.44
Chr04_4030700_snp8645	4030700	138.32
Chr04_4266707_dart13487	4266707	140.82
Chr04_4035446_snp2998	4035446	142.38
Chr04_4128140_snp847	4128140	143.31
Chr04_4228326_dart12057	4228326	147.1
Chr04_4257359_snp11939	4257359	150.57
Chr04_3869119_snp2383	3869119	151.5
Chr04_3487898_dart4429	3487898	152.43
Chr04_4660298_snp8723	4660298	153.99
Chr04_5016343_snp1998	5016343	158.43
Chr04_5016021_snp12448	5016021	162.54
Chr04_4965430_dart4619	4965430	164.41
Chr04_5016277_snp11234	5016277	165.03
Chr04_5045180_snp5743	5045180	166.27
Chr04_5019371_snp3048	5019371	166.27
Chr04_5211278_snp10827	5211278	166.27
Chr04_5299507_snp12074	5299507	167.83
Chr04_5299507_dart15734	5299507	170.51
Chr04_5362219_snp8266	5362219	172.3
Chr04_5485376_dart14144	5485376	175.39
Chr04_5796216_snp3796	5796216	175.39
Chr04_5698541_snp8445	5698541	175.39
Chr04_5698607_snp5462	5698607	177.41
Chr04_5988895_snp316	5988895	177.42
Chr04_6959618_snp1951	6959618	178.37
Chr04_6960028_dart4896	6960028	178.94
Chr04_7069188_snp11912	7069188	181.23
Chr04_8032107_snp9751	8032107	183.11
Chr04_7429730_dart5219	7429730	183.11
Chr04_8095615_dart9163	8095615	183.83
Chr04_8250605_snp6634	8250605	185.3
Chr04_8464023_dart15676	8464023	188.44
Chr04_8655981_snp4961	8655981	190.81
Chr04_8421348_snp9107	8421348	192.79
Chr04_8471848_snp1858	8471848	194.11
Chr04_9121629_snp6993	9121629	195.99
Chr04_9194338_dart6163	9194338	197.55
Chr04_9016844_dart15729	9016844	197.55
Chr04_8861620_snp335	8861620	200.37
Chr04_9748590_snp1051	9748590	202.24
Chr04_9010476_snp5284	9010476	203.48
Chr04_9336619_snp11473	9336619	203.48
Chr04_9328169_dart11096	9328169	204.73
Chr04_8751664_snp6845	8751664	208.2
Chr04_8751664_dart12576	8751664	209.78
Chr04_8785208_snp8342	8785208	211.36
Chr04_9032609_snp9134	9032609	212.92
Chr04_9710566_dart14193	9710566	214.47
Chr04_11271888_snp2649	11271888	215.39
Chr04_12935922_snp5605	12935922	215.39
Chr04_11380085_snp5497	11380085	216.01
Chr04_11380137_snp2236	11380137	216.93
Chr04_11620998_snp6943	11620998	217.85
Chr04_12046097_snp45	12046097	218.45
Chr04_12934980_dart5553	12934980	219.06
Chr04_12049157_snp7756	12049157	219.37
Chr04_12042681_snp9178	12042681	219.68
Chr04_12364074_snp8010	12364074	221.87
Chr04_11380085_dart11372	11380085	222.81
Chr04_11692988_snp4154	11692988	223.75
Chr04_20563311_snp3335	20563311	226.21
Chr04_30182627_snp379	30182627	230.55
Chr04_18442905_snp7449	18442905	237.63
Chr04_14329142_snp3638	14329142	242.39
Chr04_27697606_snp6949	27697606	248.14
Chr04_26377145_snp5543	26377145	253.35
Chr04_15216109_dart808	15216109	256.49
Chr04_16109942_snp8418	16109942	257.71
Chr04_32571940_snp158	32571940	260.22
Chr04_18562165_dart5796	18562165	261.77
Chr04_14685796_snp8144	14685796	263.33
Chr04_14159526_snp19	14159526	263.33
Chr04_14159466_snp1137	14159466	266.16
Chr04_22285053_dart12226	22285053	268.22
Chr04_39571986_dart5809	39571986	270.29
Chr04_33731013_snp3226	33731013	270.29
Chr04_30291647_snp393	30291647	274.73
Chr04_40676334_dart13067	40676334	277.3
Chr04_33952344_dart5960	33952344	279.86
Chr04_21352551_dart15560	21352551	280.79
Chr04_20589888_snp2471	20589888	282.03
Chr04_33339058_dart9370	33339058	283.58
Chr04_36272890_dart5806	36272890	284.83
Chr04_33959235_dart5213	33959235	287.19
Chr04_18562099_snp1725	18562099	288.96
Chr04_33166274_dart4383	33166274	291.79
Chr04_20393238_snp8569	20393238	291.79
Chr04_39613690_dart5862	39613690	294.61
Chr04_31406511_dart9223	31406511	299.04
Chr04_31406511_snp2072	31406511	302.83
Chr04_15788223_snp709	15788223	305.65
Chr04_29499490_snp6621	29499490	307.54
Chr04_31645960_snp11566	31645960	308.17
Chr04_36750811_snp3005	36750811	310.68
Chr04_25600593_snp3648	25600593	314.14
Chr04_37552665_snp1405	37552665	317.82
Chr04_38875960_snp5678	38875960	319.43
Chr04_35472743_snp3250	35472743	322.1
Chr04_38030162_snp5062	38030162	322.1
Chr04_39387115_snp10956	39387115	324.29
Chr04_39379369_snp3990	39379369	329.38
Chr04_39377325_snp3339	39377325	331.45
Chr04_39377577_snp5662	39377577	333.52
Chr04_39384063_snp2818	39384063	333.52
Chr04_34899602_dart8651	34899602	333.52
Chr04_31645913_dart12016	31645913	335.56
Chr04_39980732_snp10097	39980732	336.57
Chr04_39377259_dart10619	39377259	337.32
Chr04_40380695_snp1473	40380695	340.15
Chr04_40176294_snp9637	40176294	342.02
Chr04_32475203_dart5874	32475203	344.53
Chr04_43377188_dart11471	43377188	345.46
Chr04_43222578_dart13426	43222578	346.38
Chr04_42151157_snp4070	42151157	346.38
Chr04_43382572_dart6913	43382572	347.1
Chr04_43247001_dart14465	43247001	349.98
Chr04_41573180_snp3736	41573180	352.86
Chr04_41857223_snp5563	41857223	359.57
Chr04_42451042_dart14212	42451042	363.46
Chr04_41878249_snp8700	41878249	369.87
Chr04_41878249_dart13448	41878249	373.99
Chr04_42159718_snp11300	42159718	376.51
Chr04_42159718_snp11301	42159718	379.99
Chr04_41631087_snp4347	41631087	389.43
Chr04_42285143_snp5264	42285143	393.33
Chr04_42280900_snp10764	42280900	396.49
Chr04_42229881_snp6436	42229881	399
Chr04_42664345_dart11854	42664345	399
Chr04_43061809_dart5388	43061809	399.93
Chr04_42433408_snp51	42433408	400.55
Chr04_42522696_dart11727	42522696	402.42
Chr04_42279548_dart5636	42279548	404.61
Chr04_42323086_dart5132	42323086	406.81
Chr04_43299358_snp11116	43299358	413.46
Chr04_43056803_dart6317	43056803	414.99
Chr04_43706659_dart10767	43706659	418.64
Chr04_43521680_snp6050	43521680	421.13
Chr04_43597198_snp11931	43597198	421.95
Chr04_44572826_dart10022	44572826	421.95
Chr04_44660494_dart10774	44660494	422.24
Chr04_43887952_snp9908	43887952	423.16
Chr04_44429169_dart5973	44429169	423.76
Chr04_44680215_dart5195	44680215	427.8
Chr04_44474382_dart5366	44474382	434.56
Chr04_44925079_dart6053	44925079	444.07
Chr04_45082434_snp5292	45082434	448.77
Chr04_45449150_dart5963	45449150	451.06
Chr04_45499123_dart5194	45499123	451.68
Chr04_45501936_dart14595	45501936	451.68
Chr04_46352305_dart10649	46352305	451.68
Chr04_46374308_dart16045	46374308	451.68
Chr04_46643096_dart4340	46643096	451.68
Chr04_46643162_dart10220	46643162	453.24
Chr04_47147117_dart5285	47147117	454.49
Chr04_47091122_dart14018	47091122	456.11
Chr04_46855391_dart5697	46855391	459.66
Chr04_46964055_dart6010	46964055	463.29
Chr04_46817253_dart11172	46817253	464.85
Chr04_47173153_dart10729	47173153	465.88
Chr04_47325157_dart12188	47325157	467.88
Chr04_47496448_dart14805	47496448	470.48
Chr04_47440758_dart4613	47440758	475.74
Chr04_47517559_dart5339	47517559	478.26
Chr04_47147470_dart2538	47147470	482.05
Chr04_47181272_dart14642	47181272	486.17
Chr04_47114974_dart5529	47114974	490.95
Number of markers: 229
Log-likelihood: -6065.945
